# Supplementary material for: Loss of AKR1B10 promotes colorectal cancer cells proliferation and migration via regulating FGF1-dependent pathway
Source: publisher site journal article supplement (doi:10.18632/aging.103393), 2020-07-02
Supplement: Supplementary file [file aging-v12i13-103393-supplementary-material-SD1.pdf]

**SUPPLEMENTARY FIGURES**

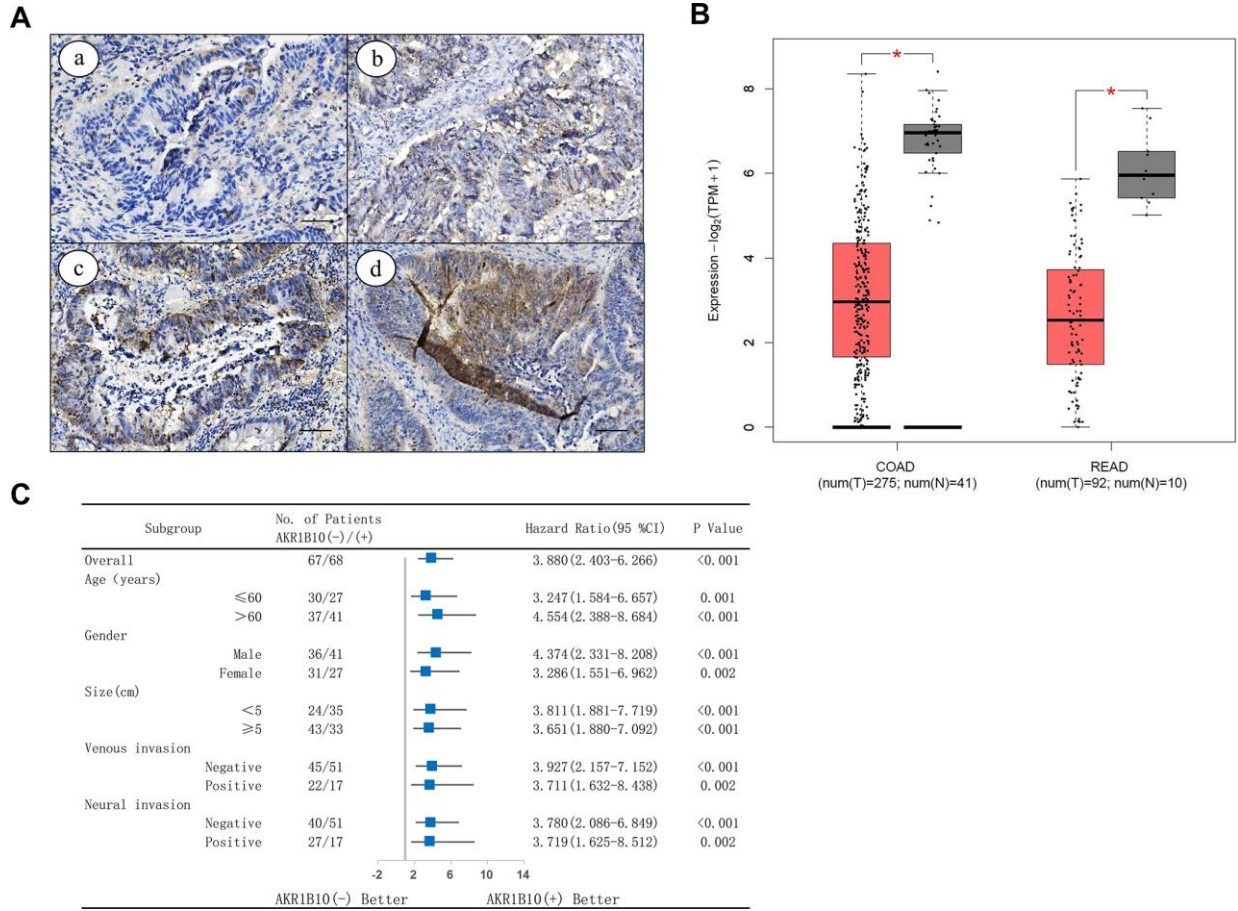

**Supplementary Figure 1. Expression of AKR1B10 in CRC in TCGA datasets. (A)** IHC images showing *in situ* AKR1B10 expression in CRC tissues (scale bar = 100µm). Negative (a), weak (b), positive (c), strong positive (d). **(B)** Comparison of AKR1B10 levels between CRC and paired normal tissues in TCGA datasets by GEPIA platform. **(C)** OS of AKR1B10<sup>pos</sup> and AKR1B10<sup>neg</sup> CRC patients in the subgroups of age, gender, tumor size, venous invasion and neural invasion. CRC, colorectal cancer. \*  $P < 0.05$ .

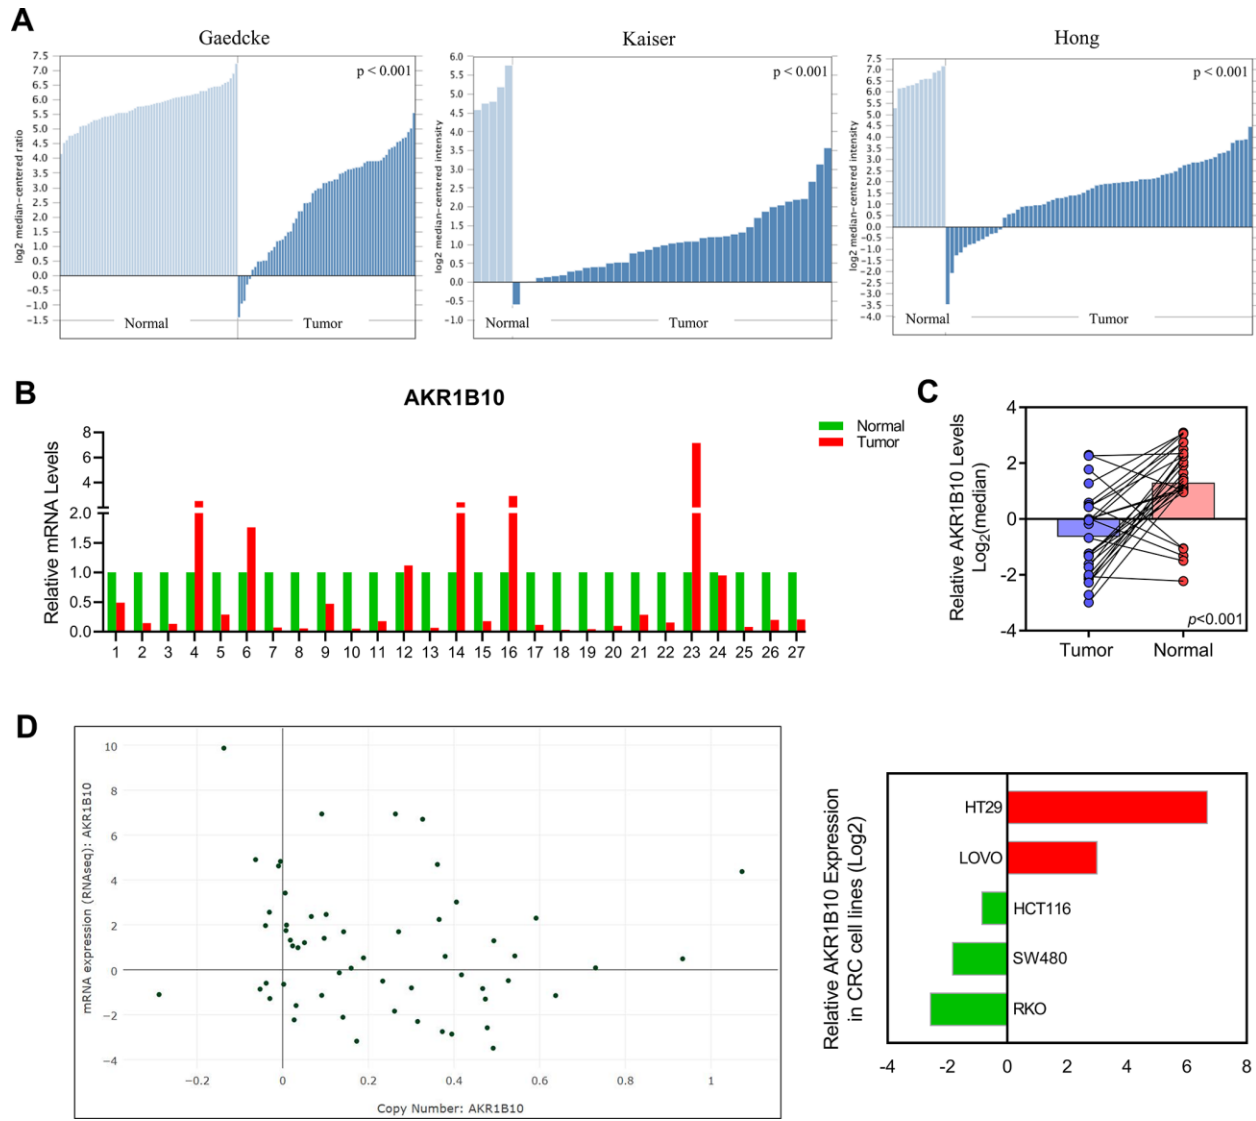

**Supplementary Figure 2. AKR1B10 expression in CRC tissues and cell lines.** (A–B) AKR1B10 mRNA levels in (A) CRC and non-tumor tissues in Oncomine datasets and (B) 27 paired CRC and normal tissues. (C) Relative AKR1B10 expression in 27 paired CRC and normal tissues. (D) AKR1B10 expression in 5 CRC cell lines from the CCLE platform. CRC, colorectal cancer. CCLE, Cancer Cell Line Encyclopedia.

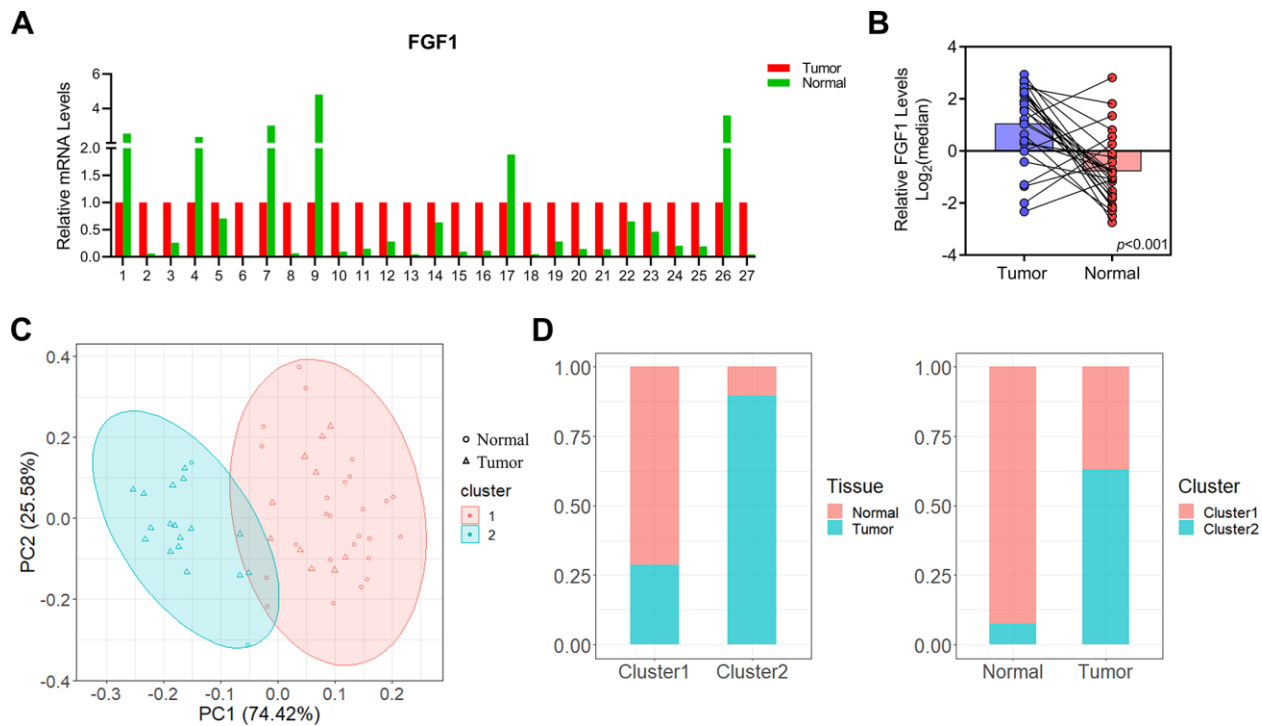

**Supplementary Figure 3. FGF1 expression in CRC and paired normal tissues.** (A) FGF1 mRNA levels in 27 paired CRC and normal tissues and (B) the relative expression levels. (C) Stratification of the 27 pairs of CRC and normal tissues into cluster 1 (red) and cluster 2 (green) according to AKR1B10 and FGF1 mRNA levels. (D) Percentage of tumor and normal samples in each cluster. CRC, colorectal cancer.
